# Supplementary material
Source: PubMed Central journal article supplement (PMC3887747)
Supplement: molcell-33-1-43-6-supplementary.pdf [file molcell-33-1-43-6-supplementary.pdf]

Supplemental table 1. List of transgenic rice plants for generation iteration, viral resistance assays and field trait evaluation.

| Vector           | Cultivar | Line no.  | T1    |    | T2    |    | T3  |    | ELISA (T1) | Field test (T3, T4) |
|------------------|----------|-----------|-------|----|-------|----|-----|----|------------|---------------------|
|                  |          |           | IR(%) | DR | IR(%) | DR | IR  | DR |            |                     |
| WT               | IP       |           | 100   | S  | 100   | S  | 100 | S  | O          | O                   |
| Empty vector     | IP       | 2_8_1     | 65    | S  | 65    | S  |     |    | O          |                     |
|                  |          | 2_8_2     |       |    | 65    | S  |     |    |            |                     |
|                  |          | 2_8_3     |       |    | 65    | S  |     |    |            |                     |
|                  |          | 2_8_4     |       |    | 65    | S  |     |    |            |                     |
| RNAi-RSV-CP-full | IP       | 1_1       | 0     | R  |       |    |     |    | O          |                     |
|                  |          | 1_2_1     | 15    | R  | 15    | R  |     |    | O          |                     |
|                  |          | 1_3_1     | 0     | R  | 0     | R  |     |    | O          |                     |
|                  |          | 1_4_1     | 0     | R  | 0     | R  |     |    | O          |                     |
|                  |          | 2_1_1     | 0     | R  | 0     | R  |     |    | O          |                     |
|                  |          | 2_2_1_3   | 0     | R  | 0     | R  | 0   | R  | O          |                     |
|                  |          | 2_2_5     |       |    | 0     | R  |     |    |            |                     |
|                  |          | 2_2_8     |       |    | 0     | R  |     |    |            |                     |
|                  |          | 2_3_3_2_1 | 0     | R  | 0     | R  | 0   | R  | O          | O                   |
|                  |          | 2_4_2_1   | 0     | R  | 0     | R  | 0   | R  | O          |                     |
|                  |          | 3_1       | 0     | R  |       |    |     |    | O          |                     |
|                  |          | 4_1_3     | 10    | R  | 10    | R  |     |    | O          |                     |
|                  |          | 4_2       | 0     | R  |       |    |     |    | O          |                     |
|                  |          | 4_3       | 0     | R  |       |    |     |    | O          |                     |
|                  |          | 5_1       | 0     | R  |       |    |     |    | O          |                     |
|                  |          | 5_2       | 0     | R  |       |    |     |    | O          |                     |
|                  |          | 5_3       | 30    | R  |       |    |     |    | O          |                     |
|                  |          | 6_1       | 0     | R  |       |    |     |    | O          |                     |
|                  |          | 6_2       | 0     | R  |       |    |     |    | O          |                     |
|                  |          | 6_3       | 25    | R  |       |    |     |    | O          |                     |
| 9_1_4_1          | 0        | R         | 0     | R  | 0     | R  |     |    |            |                     |
| 9_1_4_3_1        |          |           |       |    | 0     | R  |     |    | O          |                     |
| 9_2_1_3          | 0        | R         | 0     | R  | 0     | R  |     |    |            |                     |
| AS-RSV-CP-full   | IP       | 2_6       | 100   | S  |       |    |     |    | O          |                     |
|                  |          | 3_1       | 80    | S  |       |    |     |    | O          |                     |
|                  |          | 3_2_1_1   | 60    | S  | 85    | S  | 100 | S  | O          |                     |
|                  |          | 3_2_2_2_1 |       |    | 70    | S  | 100 | S  |            | O                   |
|                  |          | 3_2_3     |       |    | 80    | S  |     |    |            |                     |
|                  |          | 3_7       | 100   | S  |       |    |     |    | O          |                     |
|                  |          | 3_8       | 60    | S  |       |    |     |    | O          |                     |
|                  |          | 7_2       | 60    | S  |       |    |     |    | O          |                     |
|                  |          | 7_3       | 60    | S  |       |    |     |    | O          |                     |
|                  |          | 9_2       | 50    | S  |       |    |     |    | O          |                     |
|                  |          | 11_1      | 65    | S  |       |    |     |    | O          |                     |
|                  |          | 11_3_1    | 80    | S  | 80    | S  |     |    | O          |                     |
|                  |          | 11_3_2    |       |    | 90    | S  |     |    |            |                     |
|                  |          | 11_3_3    |       |    | 80    | S  |     |    |            |                     |
| 11_3_4           |          |           | 75    | S  |       |    |     |    |            |                     |
| 14_3_1           | 50       | S         | 80    | S  |       |    | O   |    |            |                     |
| WT               | DS       |           | 65    | S  | 65    | S  | 100 | S  |            | O                   |
|                  |          | 4-1_1_1   | 0     | R  | 0     | R  | 85  | S  |            |                     |
|                  |          | 4-1_2     |       |    | 0     | R  |     |    |            |                     |
|                  |          | 4-1_3     |       |    | 0     | R  |     |    |            |                     |
|                  |          | 5-1       | 40    | S  |       |    |     |    |            |                     |
|                  |          | 5-2_4_1_1 | 0     | R  | 0     | R  | 0   | R  |            | O                   |
|                  |          | 6-1       | 40    | S  |       |    |     |    |            |                     |

RNAi-RSV-CP-full DS

|            |    |   |    |   |   |   |  |   |
|------------|----|---|----|---|---|---|--|---|
| 6-2        | 40 | S |    |   |   |   |  |   |
| 7-1        | 40 | S |    |   |   |   |  |   |
| 9-1_1_2_1  | 0  | R | 0  | R | 0 | R |  | O |
| 9-1_2      |    |   | 0  | R |   |   |  |   |
| 9-1_3      |    |   | 0  | R |   |   |  |   |
| 9-1_4      |    |   | 0  | R |   |   |  |   |
| 9-2_1      | 45 | S | 20 | R |   |   |  |   |
| 10-2_3_2   | 10 | R | 10 | R | 0 | R |  |   |
| 11-1       | 45 | S |    |   |   |   |  |   |
| 12-1       | 50 | S |    |   |   |   |  |   |
| 12-2_1_1   | 5  | R | 5  | R | 0 | R |  |   |
| 12-2_2     |    |   | 5  | R |   |   |  |   |
| 13-1       | 20 | R |    |   |   |   |  |   |
| 13-2       | 45 | S |    |   |   |   |  |   |
| 14-1       | 40 | S |    |   |   |   |  |   |
| 14-2_1_2   | 10 | R | 10 | R | 0 | R |  |   |
| 14-2_2_1_1 |    |   | 0  | R | 0 | R |  | O |
| 15-1       | 45 | S |    |   |   |   |  |   |
